# Supplementary material
Source: Research Square preprint supplement (doi:10.21203/rs.3.rs-9931328/v1)
Supplement: Supplementary file 1 [file 3810d4fd4a9697e166967820.docx]

**Supplementary Methods**

**Recombinant protein construction and purification.** Codon-optimized DNA fragments encoding the indicated protein sequences were synthesized (Bioneer, Daejeon, Republic of Korea) and amplified by PCR using primers containing restriction sites (Supplementary Table 1). PCR products and the pSecTag2 B mammalian expression vector (V900-20, Invitrogen) were digested with the corresponding restriction enzymes at 37 °C for 3 h and ligated using T4 DNA ligase (M001S, Enzynomics) at 16 °C overnight to generate single-insert or fusion constructs. Ligation mixtures were transformed into chemically competent *Escherichia coli* TOP10 cells and plated on LB agar containing ampicillin (100 µg/mL). Plasmid sequences were verified by Sanger sequencing (Macrogen, Seoul, Republic of Korea). Recombinant proteins were expressed in Expi293F cells (Thermo Fisher Scientific) following transient transfection and harvested at 72h post-transfection. Secreted proteins in clarified culture supernatants were purified by [affinity chromatography method; e.g., His-tag IMAC] and buffer-exchanged by dialysis against PBS at 4 °C overnight using a 12-14 kDa MWCO dialysis membrane (08-667E, Thermo Fisher Scientific). Protein purity was assessed by SDS-PAGE followed by Coomassie blue staining, and protein identity was confirmed by immunoblotting using in-house mouse polyclonal anti-FlaB and anti-E7 antibodies. For antibody generation, mice were immunized with the respective antigens emulsified in Complete Freund’s Adjuvant (CFA; F5881, Sigma-Aldrich).

**TLR5 reporter assay.** HEK-Blue™ hTLR5 reporter cells (hkb-htlr5, InvivoGen), which stably express an NF-κB-inducible SEAP reporter, were maintained according to the manufacturer’s instructions. For the assay, cells were seeded at 2.5 x 10⁴ cells/well in 96-well flat-bottom plates and stimulated with serial dilutions of recombinant proteins for 16 h at 37 °C. SEAP activity was measured using the HEK-Blue™ Detection system (hb-det2, InvivoGen) by incubating culture supernatants with the detection reagent and reading absorbance at 620 nm on an Epoch microplate spectrophotometer (BioTek/Agilent). EC50 values were calculated by non-linear regression analysis.

**Pharmacokinetic (serum signal) analysis.** To assess systemic persistence of the recombinant proteins, 7-week-old female BALB/c mice were injected intraperitoneally with 200 µg of purified protein in a total volume of 200 µL per mouse (n = 3 per group). Blood samples were collected from the retro-orbital sinus at 0, 0.5, 1, 2, 4, 6, and 24 h post-injection using heparinized capillary tubes. Serum was isolated by centrifugation and stored at - 20 °C until analysis. Serum protein levels were measured by sandwich ELISA.High-binding 96-well plates were coated overnight at 4 °C with purified mouse anti-FlaB IgG (1:50 in PBS; 40 µL per well), washed with PBS containing 0.05% Tween-20 (PBS-T), and blocked for 1 h at room temperature with blocking buffer (PBS supplemented with 15% FBS, 0.05% Tween-20, and 1 mM EDTA).Serum samples (40 µL per well) were added and incubated for 2 h at room temperature. After washing, bound proteins were detected using HRP-conjugated anti-6xHis antibody (1:500; Abcam, cat. no. ab1187) for 1.5 h at room temperature. After a final wash, plates were developed with TMB substrate, the reaction was stopped with 2 N H₂SO₄, and absorbance was read at 450 nm. Overall systemic exposure was summarized as the area under the OD450-time curve from 0 to 24 h post-injection (AUC0~24h). AUC0~24h AUC was calculated for each mouse using the GraphPad Prism v10.6.1, and data are presented as mean ± SEM (n = 3 mice per group). Group comparisons of AUC0~24h were performed using unpaired two-tailed Student’s t tests (pDEF vs eDEF3, pDEF vs eDEF5, and eDEF3 vs eDEF5). A p-value < 0.05 was considered statistically significant.

**BMDC generation and protein uptake/localization assays.** Bone marrow-derived dendritic cells (BMDCs) were generated from C57BL/6 mice. Bone marrow cells were collected from femurs and tibias, and erythrocytes were removed using ACK lysis buffer (A10492-01, Gibco/Thermo Fisher Scientific). Cells were passed through a 40 µm cell strainer (352340, Falcon, USA), resuspended in RPMI 1640 supplemented with 10% heat-inactivated fetal bovine serum (FBS), 100 U/mL penicillin, and 100 µg/mL streptomycin. Subsequently, the cells were counted and diluted to 5 × 105 cells in 15 mL of dendritic cell medium (DC-medium), and cultured in the presence of recombinant mouse GM-CSF (10 ng/mL; R&D Systems, 415-ML-010) and IL-4 (10 ng/mL; R&D Systems, 415-ML-010). Fresh cytokine-containing medium was replenished every 2 days. On day 7, non-adherent and loosely adherent cells were collected and used for downstream assays. For the uptake assay by confocal microscopy, prokaryotic and eukaryotic DEF proteins were incubated with BMDCs (5 × 105 cells) at 20 μg/mL of recombinant protein for 2 h in serum-free RPMI 1640. Cells were washed twice with cold PBS containing 3% FBS (FACS buffer), then fixed with 4% paraformaldehyde (BPP-9004, T&I) for 10 min at room temperature. After 2 washes, cells were surface-stained with anti-mouse CD11c biotin antibody (clone N418, BioLegend) and DAPI for 1 h at 4 °C. Further, for intracellular staining, cells were permeabilized using a permeabilization kit (00-8333-56, Invitrogen/Thermo Fisher Scientific) and stained with a rabbit anti-FlaB primary antibody, followed by secondary antibodies, Streptavidin Alexa Fluor-647 (BioLegend) and Alexa Fluor-488-conjugated goat anti-rabbit IgG (H+L) (A11008, Life Technologies Corporation). Finally, washed twice with cold PBS, and mounted using mounting medium (SP15-100, Fisher Chemical). Images were acquired using a Zeiss LSM 900 confocal laser scanning microscope and analyzed with ZEN 2012 software (Carl Zeiss).

To compare the uptake of prokaryotically pEF and pDEF versus eukaryotically expressed eDEF proteins, BMDCs (1 × 106 cells) were incubated with the indicated concentrations of recombinant proteins for 2 h in serum-free RPMI 1640. Cells were washed twice with cold PBS containing 3% FBS and surface-stained with anti-mouse CD11c antibody (clone N418, 25-0114-82, eBioscience/Thermo Fisher Scientific) for 1 h at 4 °C. For intracellular staining, cells were fixed with 4% paraformaldehyde (BPP-9004, T&I) for 10 min at room temperature, permeabilized using a permeabilization kit (00-8333-56, Invitrogen/Thermo Fisher Scientific), and stained with rabbit anti-FlaB primary antibody followed by Alexa Fluor-conjugated goat anti-rabbit IgG secondary antibody (A21429, Invitrogen). Data were acquired on a CytoFLEX LX flow cytometer (Beckman Coulter) and analyzed using FlowJo software (Tree Star).

**In vivo bioluminescence imaging.** The mRNA template encoding the DCpep6-Fluc-FlaB (DLF) reporter was generated using the Takara mRNA cloning kit (cat. no. 6143; Takara Bio). mRNA was synthesized using the Takara IVTpro™ T7 mRNA Synthesis Kit (cat. no. 6144; Takara Bio) with co-transcriptional capping using CleanCap® Reagent AG (3′ OMe) (cat. no. N-7113; TriLink). Female C57BL/6 mice (6-8 weeks old; n = 5) were subcutaneously inoculated with 5 x 10⁵ TC-1 cells in the flank. When tumors reached an average diameter of 3~5 mm, mice received a peritumoral s.c. injection of 10 µg DLF mRNA encapsulated in LNPs (formulation described above; injection volume 100 µL). At 6, 12, 24, and 48 h post-injection, mice were administered D-luciferin intraperitoneally (30 mg/ml; Promega, cat. no. E1605) and imaged exactly 10-15 min later using an IVIS Lumina S5 system (PerkinElmer/Revvity). Images were acquired using consistent acquisition settings (exposure time, binning, f/stop, and FOV) across all animals. Bioluminescence was quantified in Living Image software (v4.74) by measuring radiance (photons/s/cm²/sr) within a fixed-size ROI over the tumor and subtracting background signal. Images were analysed using Living Image 4.8.2.

**Supplementary Figure Legends**

**Fig. S1.** **Construction and characterization of eukaryotically expressed, protein-based, all-in-one DEF vaccines. (A)** Schematic vector maps of recombinant constructs encoding DCpep6, E7ΔNLS, and engineered FlaB variants [eFlaB(WT), eFlaB1M (N83A), eFlaB2M (N83A/N101A), eFlaB3M (N83A/N101A/N139A), eFlaB4M (N83A/N101A/N139A/N273A), and eFlaB5M (N83A/N101A/N139A/N273A/N330A)]; eFlaB1M-eFlaB5M correspond to eDEF1-eDEF5, respectively. **(B)** Purified recombinant proteins were analyzed by SDS-PAGE and immunoblotting using mouse anti-FlaB or anti-E7 sera. **(C)** TLR5-dependent NF-κB activation was measured using HEK-Blue™ hTLR5 reporter cells. Dose-response curves and EC50 values are shown for pDEF, eDEF3, and eDEF5 (mean ± SEM, n = 3). **(D)** Pharmacokinetics of pDEF and eDEF variants were assessed by ELISA-based quantification of serum OD450 signals at the indicated time points (mean ± SEM, n = 3 mice per group). Overall systemic persistence was summarized as the area under the OD450-time curve from 0 to 24 h (AUC0~24h), calculated for each mouse in GraphPad Prism v10.6.1 (trapezoidal method). Group comparisons of AUC0~24h were performed using unpaired two-tailed Student’s t-tests (pDEF vs eDEF3, pDEF vs eDEF5, and eDEF3 vs eDEF5). (*P < 0.05; **P < 0.01; ***P < 0.001; ****P < 0.0001; ns, not significant).

**Fig. S2**. **Therapeutic efficacy of the eukaryotically expressed, protein-based all-in-one DEF vaccine in the TC-1 tumor model.** **(A)** Experimental scheme for therapeutic vaccination and immune monitoring in TC-1 tumor-bearing mice (days post-tumor implantation and vaccination are indicated). **(B)** C57BL/6 mice bearing established TC-1 tumors (3~5 mm) were vaccinated peritumorally with PBS, pDEF, eDEF3, or eDEF5 (20 μg per dose) on days 0, 5, and 10 (n = 5 mice per group). Tumor sizes were measured with digital calipers at the indicated time points, and tumor volumes were calculated as V = (L x W2)/2, where L is the longest diameter, and W is the perpendicular diameter. **(C)** Kaplan-Meier survival curves are shown. Statistical significance was determined using the log-rank (Mantel-Cox) test (*P < 0.05; **P < 0.01; ***P < 0.001; ****P < 0.0001; ns, not significant).

**Fig. S3**. **Long-term antitumor immunity following TC-1 rechallenge. (A)** Rechallenge scheme. Tumor-free survivors from the primary eDEF3 treatment group were rechallenged by subcutaneous implantation of TC-1 cells (1 x 105) into the contralateral flank. Age-matched naïve mice were included as controls. Tumor growth and survival were monitored in tumor-bearing mice at the indicated time points. Kaplan-Meier survival curves are shown. Statistical significance was determined using the log-rank (Mantel-Cox) test. **(B)** The frequency of HPV16 E7-specific CD8⁺ T cells in peripheral blood was assessed on day 23 post-rechallenge by H-2Dᵇ/RAHYNIVTF tetramer staining (n = 3~5 mice/group). Statistical significance was determined using an unpaired t-test. (*P < 0.05; **P < 0.01; ***P < 0.001; ****P < 0.0001; ns, not significant).

**Fig. S4. Dose-dependent uptake and intracellular localization of pDEF and eDEF3 in BMDCs. (A)** Representative confocal images of BMDCs incubated with pEP, pDEF, or eDEF3 (10 μg/mL, 2 h) showing intracellular signal distribution. **(B)** Dose-dependent uptake by CD11c⁺ BMDCs was quantified by flow cytometry after incubation with pEF, pDEF, or eDEF3 (1-20 μg/mL, 2 h). Cells were fixed and permeabilized, stained with anti-FlaB serum, and uptake was reported as %FlaB within the CD11c⁺ gate (n =3 independent experiments). Statistical significance was determined using an unpaired t-test. (*P < 0.05; **P < 0.01; ***P < 0.001; ****P < 0.0001; ns, not significant).

**Fig. S5. Therapeutic efficacy of mR-DEF3 and HPV16 E7-specific CD8⁺ cell responses following tumor rechallenge. (A)** Therapeutic efficacy of mR-DEF3 compared with control groups at day 35 after TC-1 tumor inoculation, as determined by tumor volume measurement. Data are presented as mean ± SEM. Statistical significance was assessed using a two-way ANOVA with appropriate post hoc testing. **(B)** Representative flow cytometric analysis and quantification of HPV16 H-2Dᵇ-RAHYNIVTF tetramer-positive CD8⁺ cells among peripheral blood CD45⁺ leukocytes from tumor-rechallenged mice at day 162. Frequencies are shown as percentages of total CD8⁺ cells.

**Fig. S6. (A)** Flow cytometric gating strategy for phenotypic analysis of CD8⁺ cells after exclusion of doublets and dead cells. **(B)** Flow cytometric gating strategy for memory CD8⁺ cell subsets. Splenocytes were sequentially gated as lymphocytes (FSC-A vs SSC-A), singlets (FSC-H vs FSC-A), and live CD45⁺ leukocytes, and then CD8⁺ cells were isolated. CD8⁺ cells were further subdivided based on CD44 and CD62L expression into effector memory (TEM: CD44⁺CD62L⁻), central memory (TCM: CD44⁺CD62L⁺), and naïve (CD44⁻CD62L⁺) subsets. In parallel, differentiation status was assessed using KLRG1 and CD127 to define short-lived effector cells (SLEC: KLRG1⁺CD127⁻) and memory precursor effector cells (MPEC: KLRG1⁻CD127⁺). Antigen-specific CD8⁺ cells were identified using E7 tetramer staining and analyzed for their distribution across memory subsets. This hierarchical gating strategy enables detailed characterization of vaccine-induced CD8⁺ cell differentiation and antigen specificity. **(C)** Flow cytometric analysis for tetramer⁺ short-lived effector cells (SLECs), memory-precursor effector cells (MPECs), and central memory (TCM) CD8⁺ T cells in the tdLNa and spleen. (D) E7-specific IFN-γ ELISPOT responses in spleen and tumor-draining lymph nodes (tdLN) after in vitro restimulation. Pooled cells isolated from the tdLN and spleen were restimulated with Medium or E7 and assessed for IFN-γ-secreting cells by ELISPOT. ConA was included as a stimulation control. **(E)** Frequency and distribution of IL-2⁺IFN-γ⁺TNF-α⁺ CD8⁺ T cells following ex vivo restimulation of splenocytes with E7 peptide. Intracellular cytokine staining was used to assess IFN-γ, TNF-α, and IL-2 production. Polyfunctional subsets, including triple-positive (IFN-γ⁺TNF-α⁺IL-2⁺) CD8⁺ cells, were quantified by Boolean gating (FlowJo combination gates). (*P < 0.05, **P < 0.01, ***P < 0.001, ****P < 0.0001; ns, nonsignificant).

**Fig. S7. In vivo bioluminescence imaging of DCpep6-Fluc-FlaB (D-Fluc-F) mRNA-LNP in TC-1 tumor-bearing mice. (A)** Schematic of the D-Fluc-F mRNA construct comprising D (DC-targeting peptide DCpep6), Fluc (firefly luciferase, *Photinus pyralis*), and F3 (engineered FlaB variant; N83/101/139A), flanked by a T7 promoter, 5′/3′ UTRs, and a poly(A) tail. **(B)** Experimental schedule for TC/1 tumor challenge and D-Fluc-F treatment. C57BL/6 mice were inoculated s.c. with 5 x 10⁴ TC‑1 cells. When tumors reached 3~5 mm in diameter, mice received 10 µg D-Fluc-F mRNA-LNP via peritumoral subcutaneous injection. **(C)** Representative IVIS images after peritumoral injection of LNP-formulated D-luc-F mRNA (10 µg) in C57BL/6 mice bearing TC-1 flank tumors. Bioluminescence imaging was performed at 6, 12, 24, and 48 h post-injection following i.p. administration of D-luciferin (100 µL of 30 mg/mL). Tumor-region signal was quantified as radiance (p/sec/cm²/sr) using Living Image v4.74 and is presented as mean ± SEM (n = 5) for D-Fluc-F mRNA. Images were acquired on an IVIS Lumina S5 and analysed in Living Image 4.8.2.

**Fig. S8. Therapeutic response to mR‑DEF3 across baseline tumor burden levels in TC-1 tumor-bearing mice.** Representative photographs of TC-1 tumor-bearing mice from each treatment group (PBS or mR-DEF3). Mice were stratified by baseline tumor diameter into 3~5 mm, 8~10 mm, and 10~15 mm cohorts. Mice received PBS (n = 5 per cohort) or 10 µg mR-DEF3 mRNA-LNP (n = 10 per cohort) via subcutaneous peritumoral injection, administered three times at 1-week intervals.

**Fig. S9.** Flow-cytometric gating strategy for myeloid populations. Representative gating strategy. (*P < 0.05, **P < 0.01, ***P < 0.001, ****P < 0.0001; ns, nonsignificant).

**Fig. S10. Heterologous mRNA-protein (mR-Pn) prime-boost vaccination induces polyfunctional E7-specific CD8⁺ T-cell responses.** **(A)** **(B)** Splenocytes from the indicated groups (mR-mR and mR-Pn) were restimulated with E7ΔNLS antigen (50 µg/ml) for 6 h in the presence of a secretion inhibitor. Intracellular cytokine staining was performed to quantify the frequency (%) of CD8⁺ T cells producing IFN-γ, TNF-α, and IL-2 upon E7ΔNLS restimulation. Data are presented as mean ± SEM (n = 5 per group). Statistical significance was determined using an unpaired t-test (*P < 0.05; **P < 0.01; ***P < 0.001; ****P < 0.0001; ns, not significant).

**Table S1.** PCR primers used in this study. Underlined sequences indicate the recognition sites of the restriction enzyme, and bold-marked ones represent overlapping sequences.

| **Primers for protein constructs** | |
| --- | --- |
| eDEF FP *BamHI* | 5’-CGCGGATCCCGGTTCTTTTGCCTGGGCCCTC-3’ |
| eDEF RP *NotI* | 5’-TAAAGCGGCCGCGCCCAGCAGGGAGAGGGC-3’ |
| **Primers for mRNA constructs** | |
| mR-D-Fluc-F FP | 5’-**GAGAGAACCCGCCACC**ATGCGGTTTTTCTGCCTTGG-3’ |
| mR-D-Fluc-F RP | 5’-**CGAGGCTCCAGCTCA**TCATCCCAACAGGGAC-3’ |
| mR-E FP | 5’-**GAGAGAACCCGCCACC**ATGGACGCCATGAAGAGAGGC-3’ |
| mR-E RP | 5’-**CGAGGCTCCAGCTCA**AGCTTTGGTTTTTGGCTACAGATAGGAC-3’ |
| mR-F FP | 5’-**GAGAGAACCCGCCACC**ATGGACGCCATGAAGAGAGGC-3’ |
| mR-F RP | 5’-**CGAGGCTCCAGCTCA**TCATCCCAACAGGGAC-3’ |
| mR-EF FP | 5’-**GAGAGAACCCGCCACC**ATGGACGCCATGAAGAGAGGC-3’ |
| mR-EF RP | 5’-**CGAGGCTCCAGCTCA**TCATCCCAACAGGGAC-3’ |
| mR-DE FP | 5’-**GAGAGAACCCGCCACC**ATGGACGCCATGAAGAGAGGC-3’ |
| mR-DE RP | 5’-**CGAGGCTCCAGCTCA**AGCTTTGGTTTTTGGCTACAGATAGGAC-3’ |
| mR-DEF FP | 5’-**GAGAGAACCCGCCACC**ATGGACGCCATGAAGAGAGGC-3’ |
| mR-DEF RP | 5’-**CGAGGCTCCAGCTCA**TCATCCCAACAGGGAC-3’ |
| mR-R/L FP | 5’-**GAGAGAACCCGCCACC**ATGGACGCCATGAAGAGAGGC-3’ |
| mR-R/L RP | 5’-**CGAGGCTCCAGCTCA**TCATTGTTCATTTTTAAGAACTCGTTCCACG-3’ |

**Table S2.** Bacterial Strains, cell lines, and Plasmids used in this study.

|  | **Description** | **Source** |
| --- | --- | --- |
| **Bacterial strains** |  |  |
| DH5α | F− recA1 restriction negative | Laboratory collection |
| TOP10 | F-mcrA Δ(mrr-hsdRMS-mcrBC) φ80lacZΔM15 ΔlacX74 recA1 araD139 Δ(ara-leu)7697 galU galK rpsL (StrR) endA1 nupG | Invitrogen |
| **Cell lines** |  |  |
| Expi293FTM | Transient eukaryotic expression cell system based on high-density suspension culture of Expi293F™ Cells in Expi293™ expression medium. | ThermoFisher Scientific Inc. |
| HEK-Blue™ hTLR5 | HEK-Blue™ hTLR5 cells are designed for studying the stimulation of human TLR5 (hTLR5) by monitoring the activation of NF-κB and AP-1. | (hκb-help-5, InvivoGen, USA |
| **Plasmids** |  |  |
| pSectag2B | Eukaryotic expression vector for the secretion of C-terminally 6xHis-tagged proteins; Ampr | Invitrogen |
| pSectag2B:DCpep6: 4xE7ΔNLS: FlaB | pSectag2B vector carrying a 1.926-kb BamHI-NotI fragment of the codon-optimized site-directed mutant FlaB (WT) | This study |
| pSectag2B::DCpep6:4xE7ΔNLS:FlaBN83 | pSectag2B vector carrying a 1.926-kb BamHI-NotI fragment of the codon-optimized site-directed mutant FlaB (N83A) | This study |
| pSectag2B:DCpep6:4xE7ΔNLS-FlaBN83/101A | pSectag2B vector carrying a 1.926-kb BamHI-NotI fragment of the codon-optimized site-directed mutant FlaB (N83A and N101A) | This study |
| pSectag2B:DCpep6:4xE7ΔNLS-FlaBN83/101/139A | pSectag2B vector carrying a 1.926-kb BamHI-NotI fragment of the codon-optimized site directed mutant FlaB (N83A, N101A and N139A) | This study |
| pSectag2B:DCpep6:4xE7ΔNLS-FlaBN83/101/139/273A | pSectag2B vector carrying a 1.926-kb BamHI-NotI fragment of the codon-optimized site directed mutant FlaB (N83A, N101A, N139A and N273A) | This study |
| pSectag2B:DCpep6:4xE7ΔNLS-FlaBN83/101/139/273/330A | pSectag2B vector carrying a 1.926-kb BamHI-NotI fragment of the codon-optimized site-directed mutant FlaB (N83A, N101A, N139A, N273A and N330A) | This study |
| Linearized template vector | The pre-linearized vector in the kit contains a T7 promoter, transcription start sequence (AGG), 5’-UTR (untranslated region), 3’-UTR, and a 105-base Poly(A) sequence, which makes it possible to construct an IVT template plasmid for IVT using Clean Cap Reagent AG for efficient translation in human, murine, or other mammalian cells. | Takara |

**Table S3.** Antibodies used in this study

| **Antibodies** | **Clone** | | **Cat. # / Company** | **Dilution** |
| --- | --- | --- | --- | --- |
| **Flow cytometry** | | | | |
| PE/Cyanine7 anti-mouse CD45.2 | 104 | | 109830 / Biolegend |  |
| FITC anti-mouse CD8a | 53-6.7 | | 100706 / Biolegend |  |
| Brilliant Violet 605™ anti-mouse/human CD44 | IM7 | | 103047 / Biolegend |  |
| BD Horizon™ BUV395 rat anti-mouse CD62L (L-Selectin) | MEL-14 | | 569400 / BD |  |
| Brilliant Violet 785™ anti-mouse/human KLRG1 (MAFA) | 2F1/KLRG1 | | 138429 / Biolegend |  |
| APC anti-mouse CD127 (IL-7Rα) | SB/199 | | 121122 / Biolegend |  |
| APC anti-mouse IL-2 | JES6-5H4 | | 503810 / Biolegend |  |
| PE anti-mouse TNF-α | MP6-XT22 | | 506305 / Biolegend |  |
| BD Horizon™ BUV737 rat anti-mouse IFN-γ | XMG1.2 | | 612769 / BD |  |
| ViaKrome 808 Fixable Viability Dye |  | | C36628 / Beckman Coulter |  |
| **Confocal assay** | | | | |
| Anti-mouse CD11c biotin antibody | N418 | 117303 / Biolegend | |  |
| Streptavidin Alexa Fluor-647 |  | 405237/ Biolegend | |  |
| Alexa Fluor-488 conjugated goat anti-rabbit IgG (H+L) |  | A-11008/ ThermoFischer Scientific | |  |
